# Supplementary material
Source: MDPI journal article supplement (https://www.mdpi.com/2073-4441/13/22/3251)
Supplement: s1 [file s1]

**The following supplementary information appendix covers one main sections.**

The first section presents are the supplementary in the section **2.3 Synthetic Wastewater** of the text content about synthetic wastewater:

Trace elements were added to the influent, including 0.05, 0.2, 0.15, 10, 1.5, 0.15, 0.15, 0.22, 0.15, 0.15, 10, and 20 mg L<sup>-1</sup> H<sub>3</sub>BO<sub>3</sub>, ZnSO<sub>4</sub>·7H<sub>2</sub>O, CoCl<sub>2</sub>·6H<sub>2</sub>O, EDTA-Na<sub>2</sub>·2H<sub>2</sub>O, FeCl<sub>3</sub>·6H<sub>2</sub>O, MnCl<sub>2</sub>·4H<sub>2</sub>O, CuSO<sub>4</sub>·5H<sub>2</sub>O, Na<sub>2</sub>MoO<sub>4</sub>·2H<sub>2</sub>O, NiCl<sub>2</sub>·6H<sub>2</sub>O, KI, CaCl<sub>2</sub>, and MgSO<sub>4</sub>, respectively.

The second section presents are the supplementary table (Table S1).

**Table S1** Summary of identified denitrification bacteria and main functional genes in the literature.

| phylum                  | Genus                      | Function                      | References                   |
|-------------------------|----------------------------|-------------------------------|------------------------------|
| <i>Proteobacteria</i>   | <i>Comamonas</i>           | Aerobic denitrification       | This study                   |
| <i>Proteobacteria</i>   | <i>Acinetobacter</i>       | EPS secretion                 |                              |
| <i>Proteobacteria</i>   | <i>Zoogloea</i>            | EPS secretion                 |                              |
| <i>Firmicutes</i>       | <i>Bacillus</i>            | Aerobic denitrification       |                              |
| <i>Proteobacteria</i>   | <i>Acidovorax</i>          | denitrification               |                              |
| <i>Actinobacteria</i>   | <i>Actinobacteria</i>      | denitrification               | (Thomsen et al., 2007)       |
| <i>Proteobacteria</i>   | <i>Pseudomonas</i>         | Aerobic denitrification       |                              |
| <i>Proteobacteria</i>   | <i>Thiothrix</i>           | Aerobic denitrification       |                              |
| <i>Proteobacteria</i>   | <i>Alphaproteobacteria</i> | Aerobic denitrification       |                              |
| <i>Proteobacteria</i>   | <i>Deltaproteobacteria</i> | Aerobic denitrification       |                              |
| <i>Proteobacteria</i>   | <i>Zoogloea ramigera</i>   | Aerobic denitrification       | (Thomsen et al., 2007)       |
| <i>Proteobacteria</i>   | <i>Dyella</i>              | Aerobic denitrification       | (Yao and Peng, 2017)         |
| <i>Proteobacteria</i>   | <i>Rhodanobacter</i>       | Autotrophic denitrification   |                              |
| <i>Nitrospirae</i>      | <i>Nitrospira defluvii</i> | Nitrification                 | (Starkenburger et al., 2008) |
| <i>Bacteroidetes</i>    | <i>Mizugakiibacter</i>     | Heterotrophic denitrification | (Yao and Peng, 2017)         |
| <i>Planctomycetes</i>   | <i>Planctomycetes</i>      | Aerobic denitrification       | (Zielinska et al., 2013)     |
| <i>Chloroflexi</i>      | <i>Chloroflexi</i>         | denitrification               |                              |
| <i>Firmicutes</i>       | <i>Ferruginibacter</i>     | denitrification               | (Zhao et al., 2015)          |
| <i>Gemmatimonadetes</i> | <i>Gemmatimonadetes</i>    | Aerobic denitrification       | (Mao et al., 2014)           |
| <i>Verrucomicrobia</i>  | <i>Verrucomicrobia</i>     | denitrification               | (Zielinska et al., 2013)     |

The third section presents are the supplementary figures.

Figure S1. principal component analysis (PCA); A: R1 and B: R2

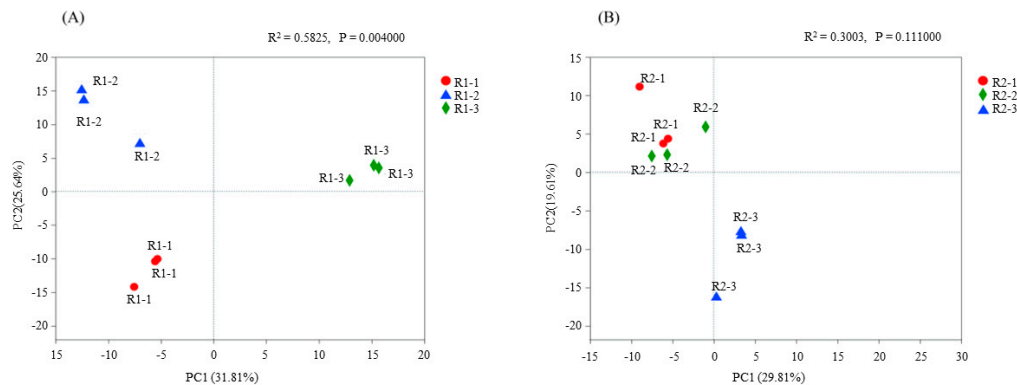

Figure S1.
